# Supplementary figures and images for: Influence of chirality on the modes of self-assembly of 12-hydroxystearic acid in molecular gels of mineral oil
Source: Royal Society of Chemistry journal article supplement (doi:10.1039/c1sm05757j), 2011-01-01

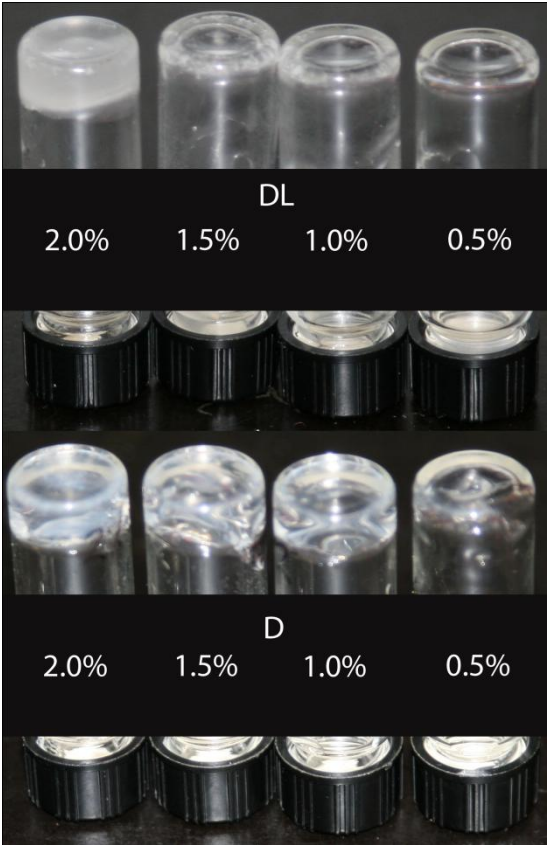

Fig. S1

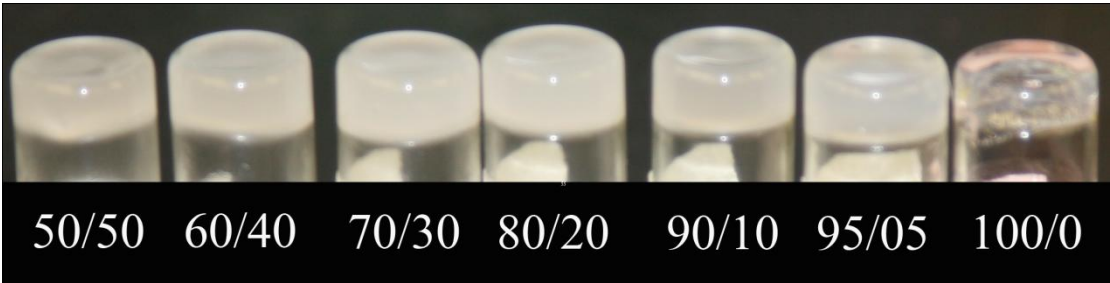

Fig. S2

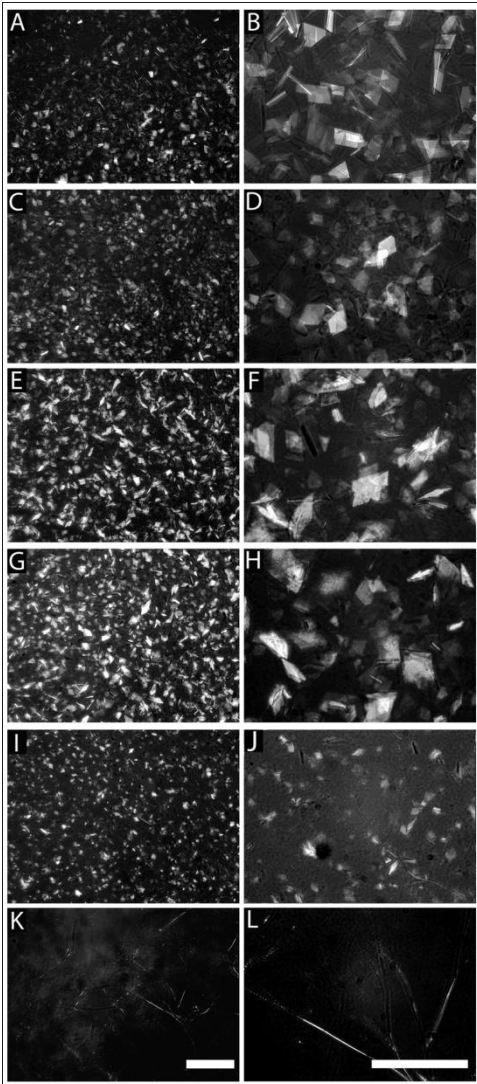

Fig. S3

Supplement: c1sm05757j.pdf [file c1sm05757j.pdf]
